# Supplementary material for: Cellular Uptake and Photo-Cytotoxicity of a Gadolinium(III)-DOTA-Naphthalimide Complex “Clicked” to a Lipidated Tat Peptide
Source: MDPI journal article supplement (doi:10.3390/molecules21020194), 2016-02-05
Supplement: s1 [file s1]

## Supplementary Information

### Cellular Uptake and Photo-Cytotoxicity of a Gadolinium(III)-DOTA-Naphthalimide Complex “Clicked” to a Lipidated Tat Peptide

William I. O'Malley, Riccardo Rubbiani, Margaret L. Aulsebrook, Michael R. Grace, Leone Spiccia, Kellie L. Tuck, Gilles Gasser, and Bim Graham

| <b>Contents</b>                                  | <b>Page(s)</b> |
|--------------------------------------------------|----------------|
| NMR spectra of reported compounds                | 2–7            |
| LC traces for final ligand and Gd(III) complexes | 8              |
| LC trace for peptide conjugate                   | 9              |

## NMR Spectra of Reported Compounds

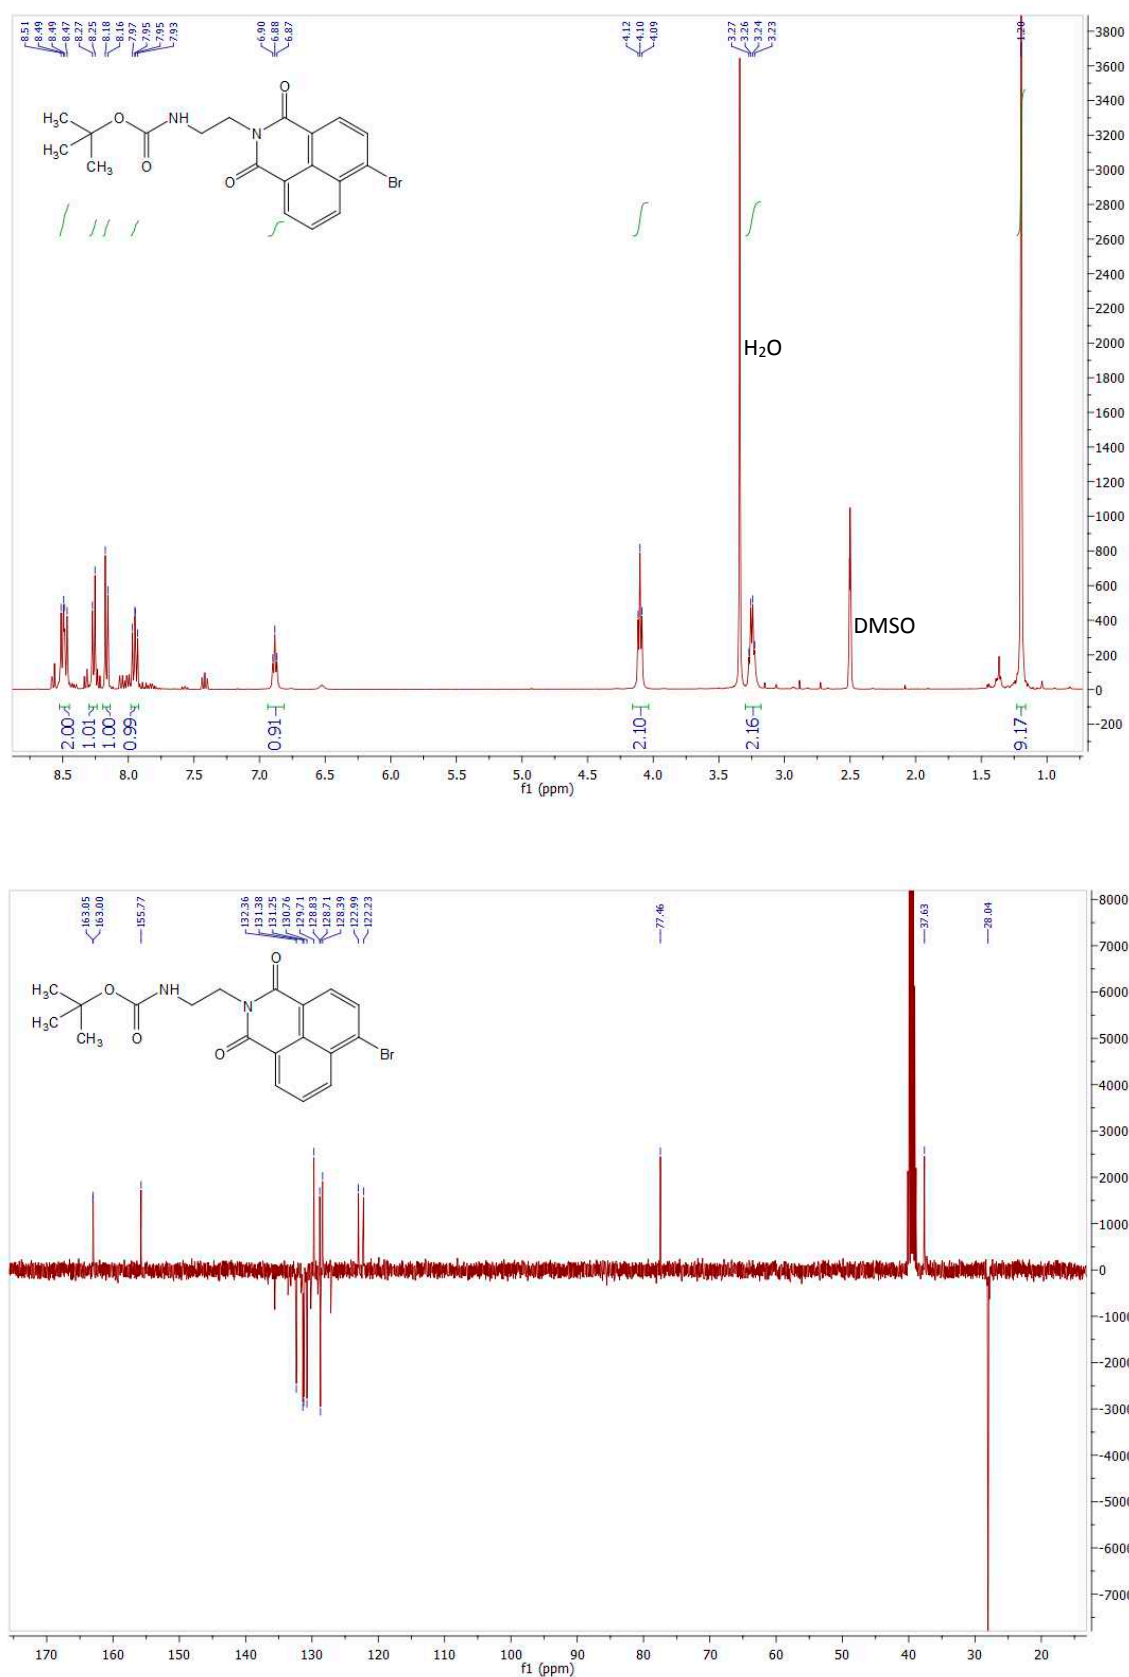

**Figure S1.** <sup>1</sup>H- and <sup>13</sup>C-NMR spectra of compound 1 in DMSO-*d*<sub>6</sub>.

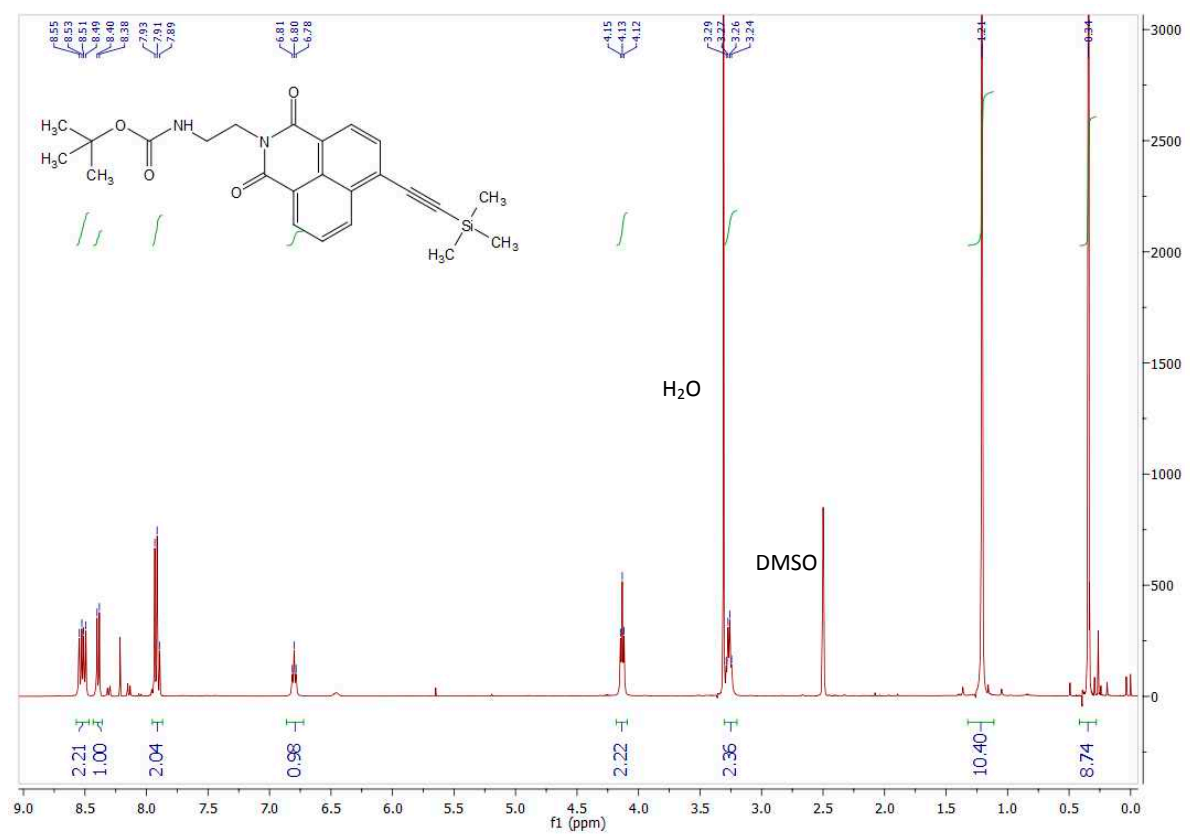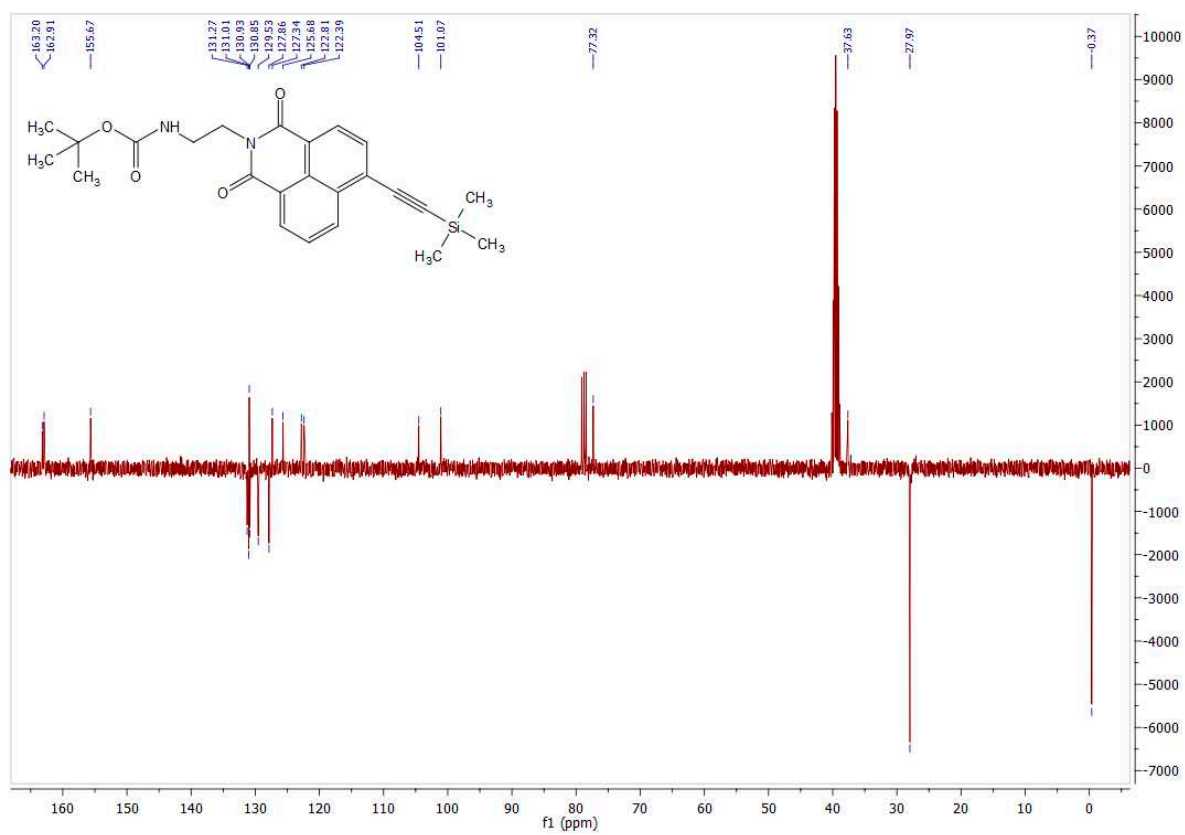

**Figure S2.** <sup>1</sup>H- and <sup>13</sup>C-NMR spectra of compound 2 in DMSO-*d*<sub>6</sub>.

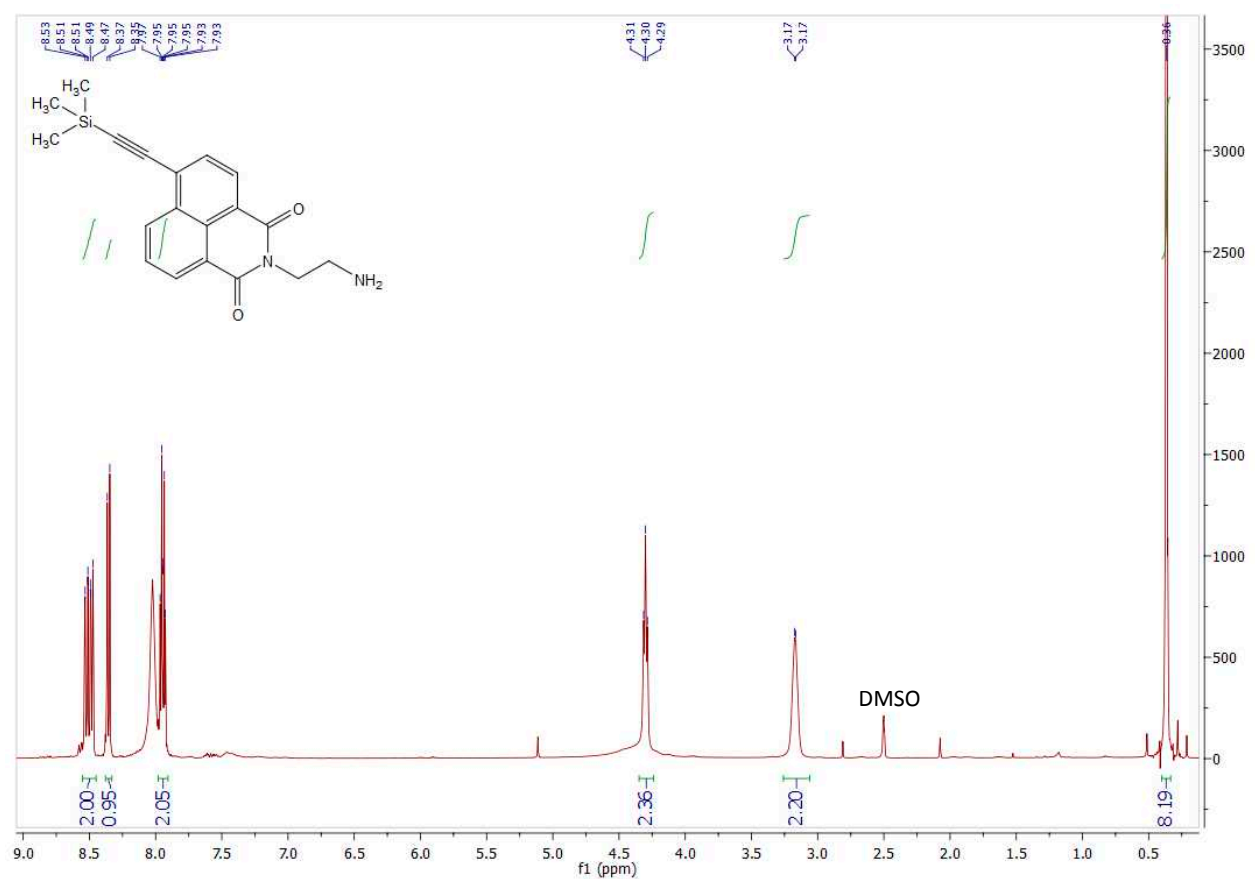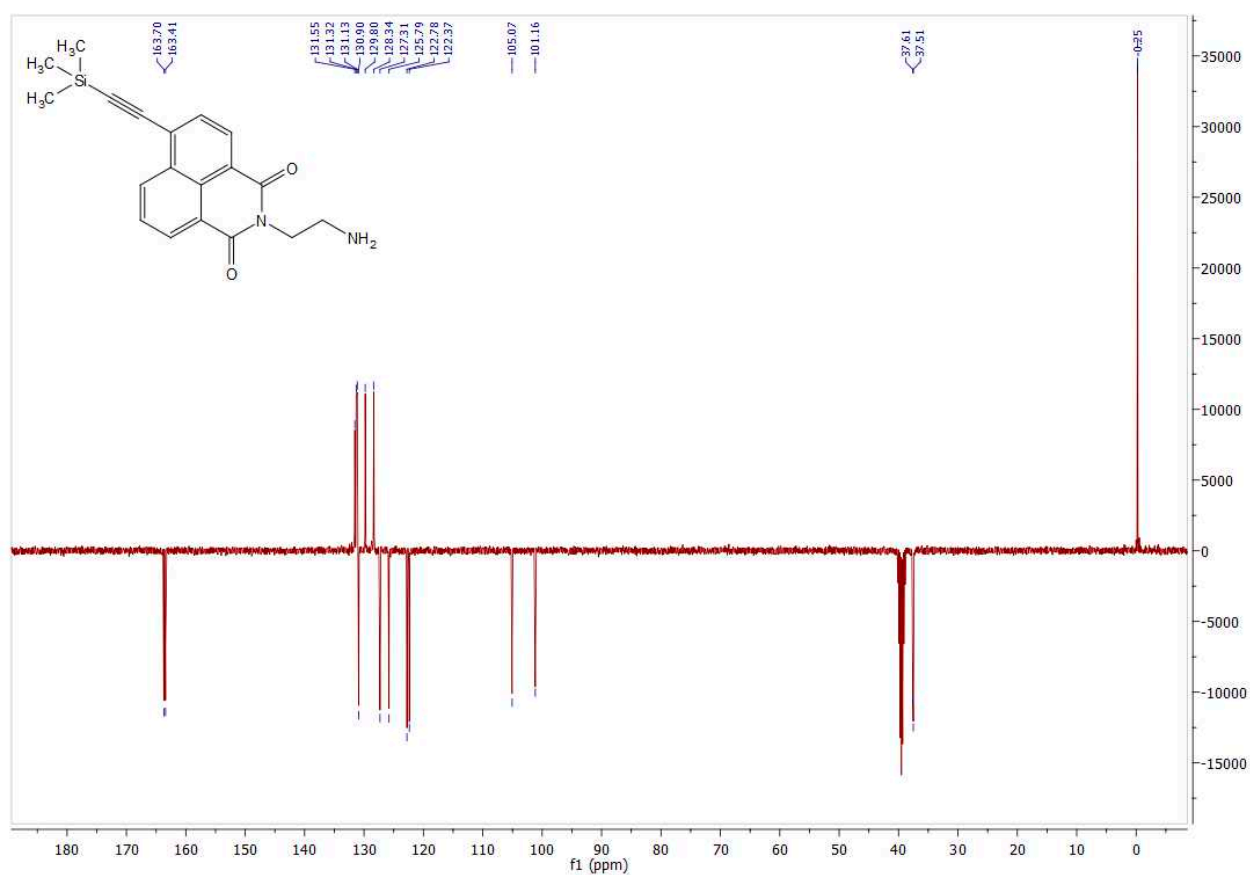

**Figure S3.** <sup>1</sup>H- and <sup>13</sup>C-NMR spectra of compound 3 in DMSO-*d*<sub>6</sub>.

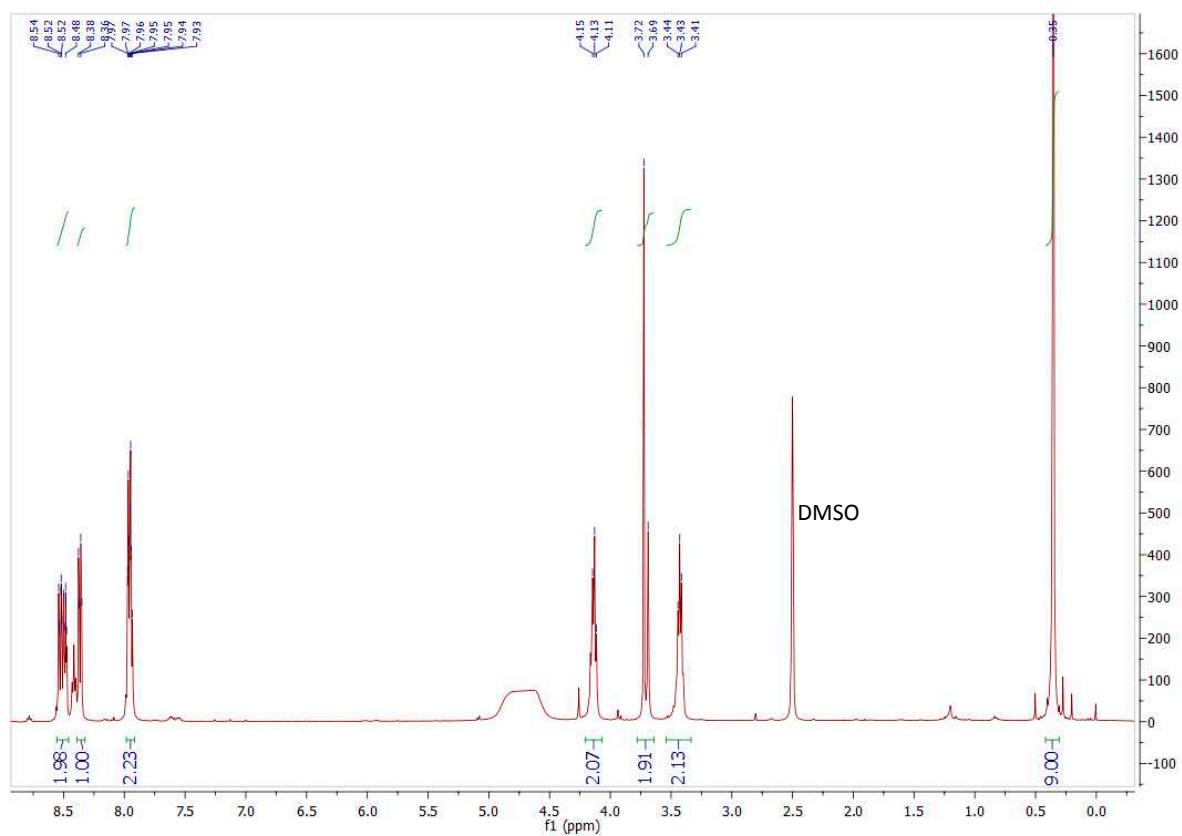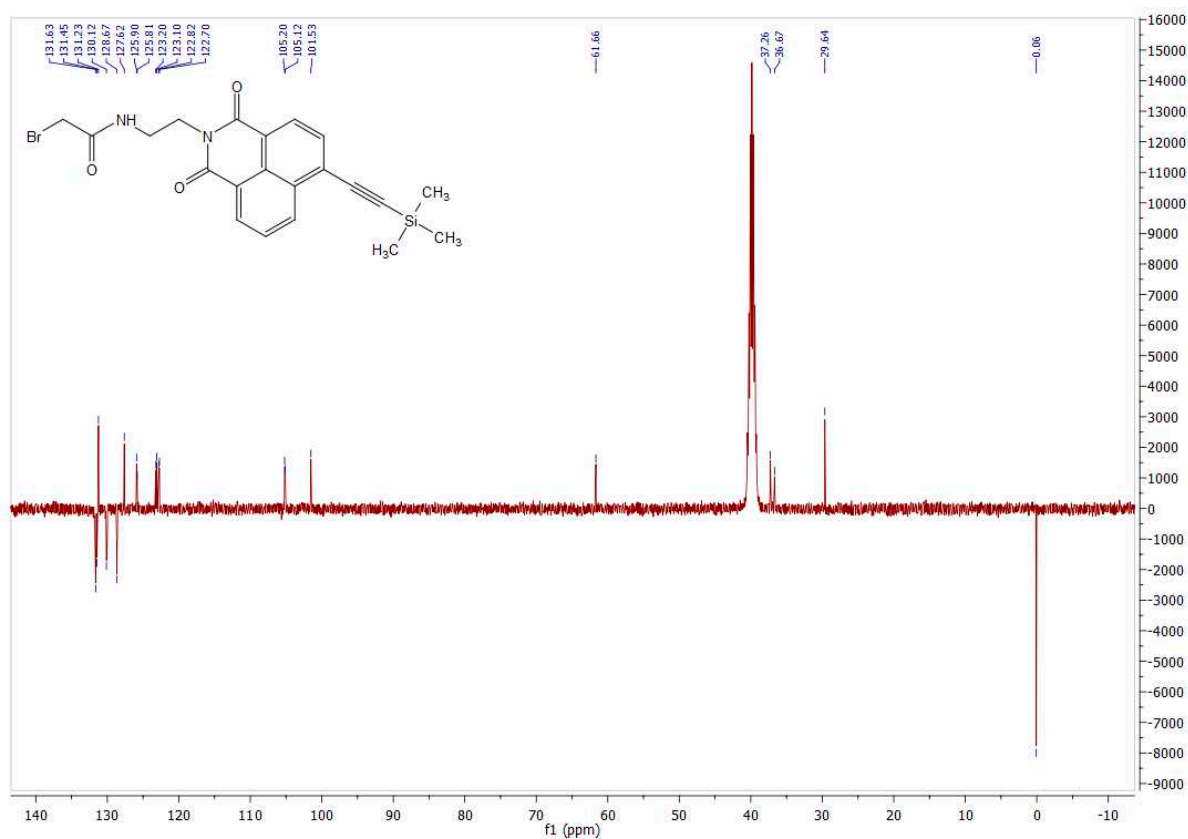

**Figure S4.** <sup>1</sup>H- and <sup>13</sup>C-NMR spectra of compound 4 in DMSO-*d*<sub>6</sub>.

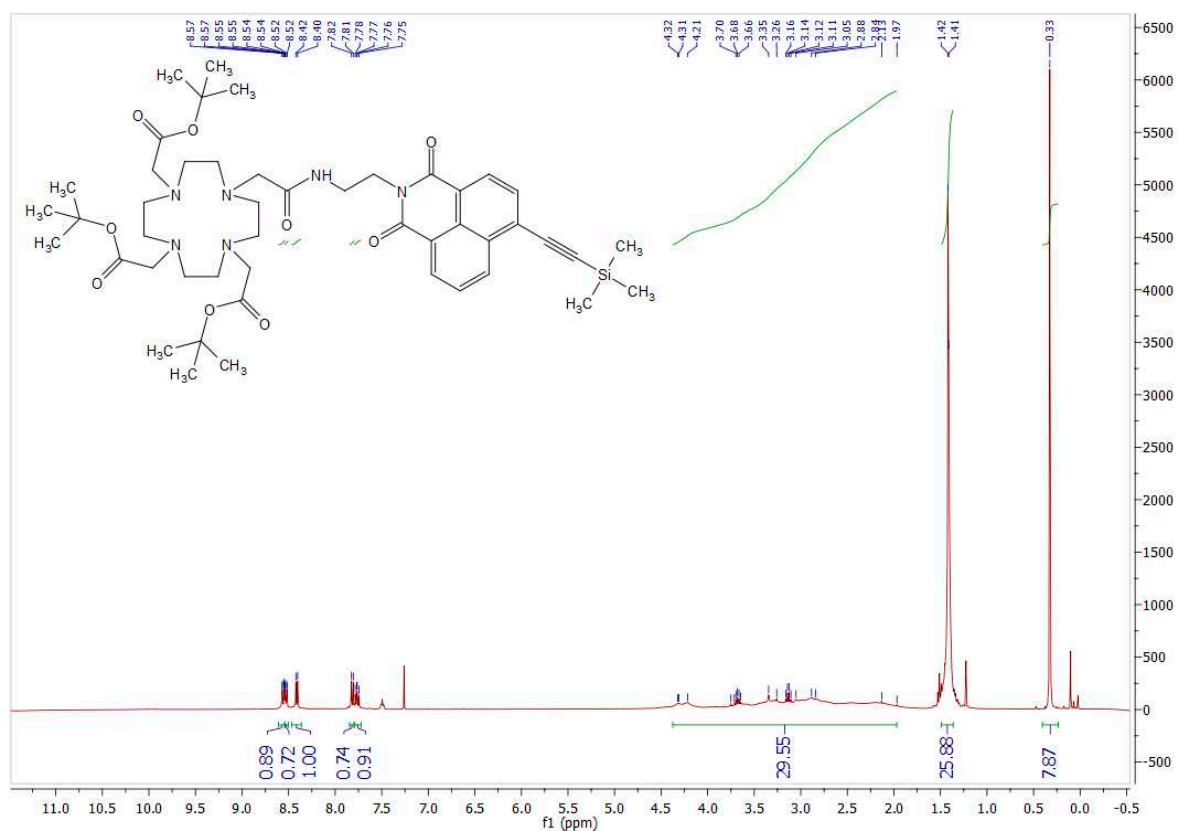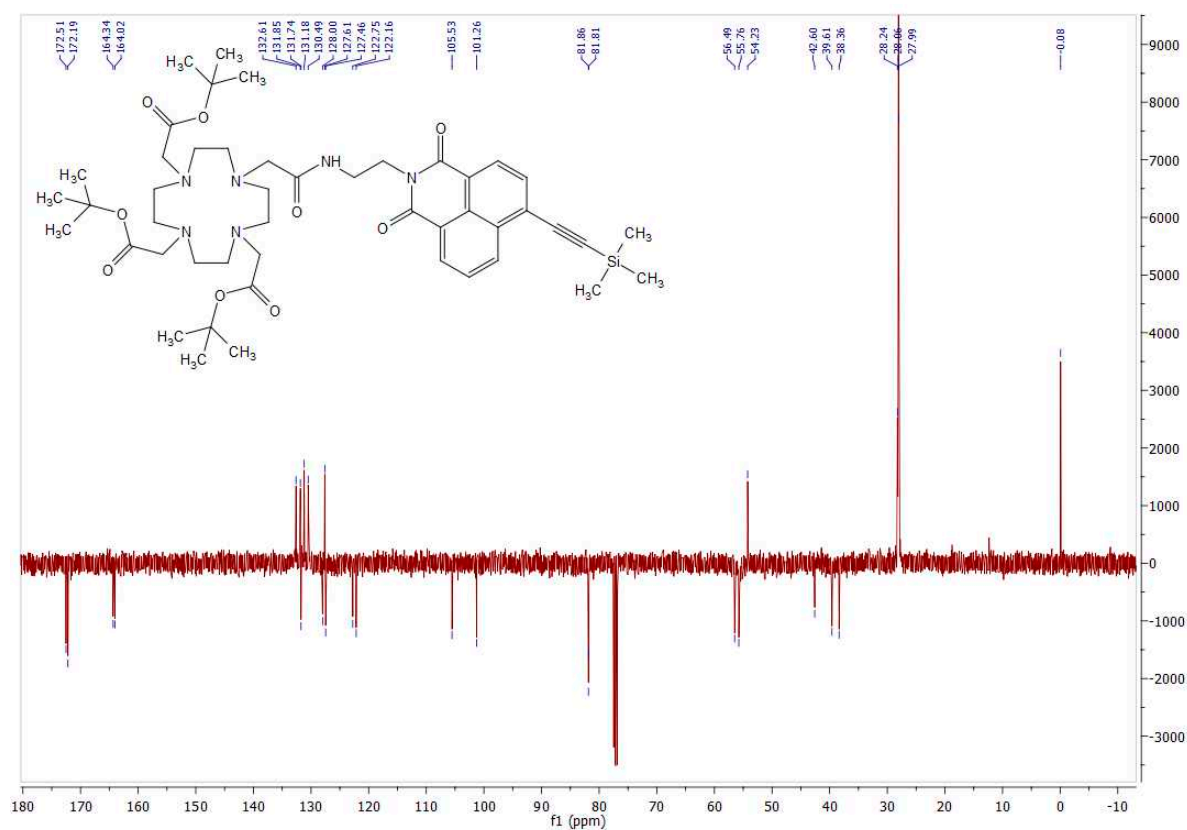

**Figure S5.** <sup>1</sup>H- and <sup>13</sup>C-NMR spectra of compound 5 in CDCl<sub>3</sub>.

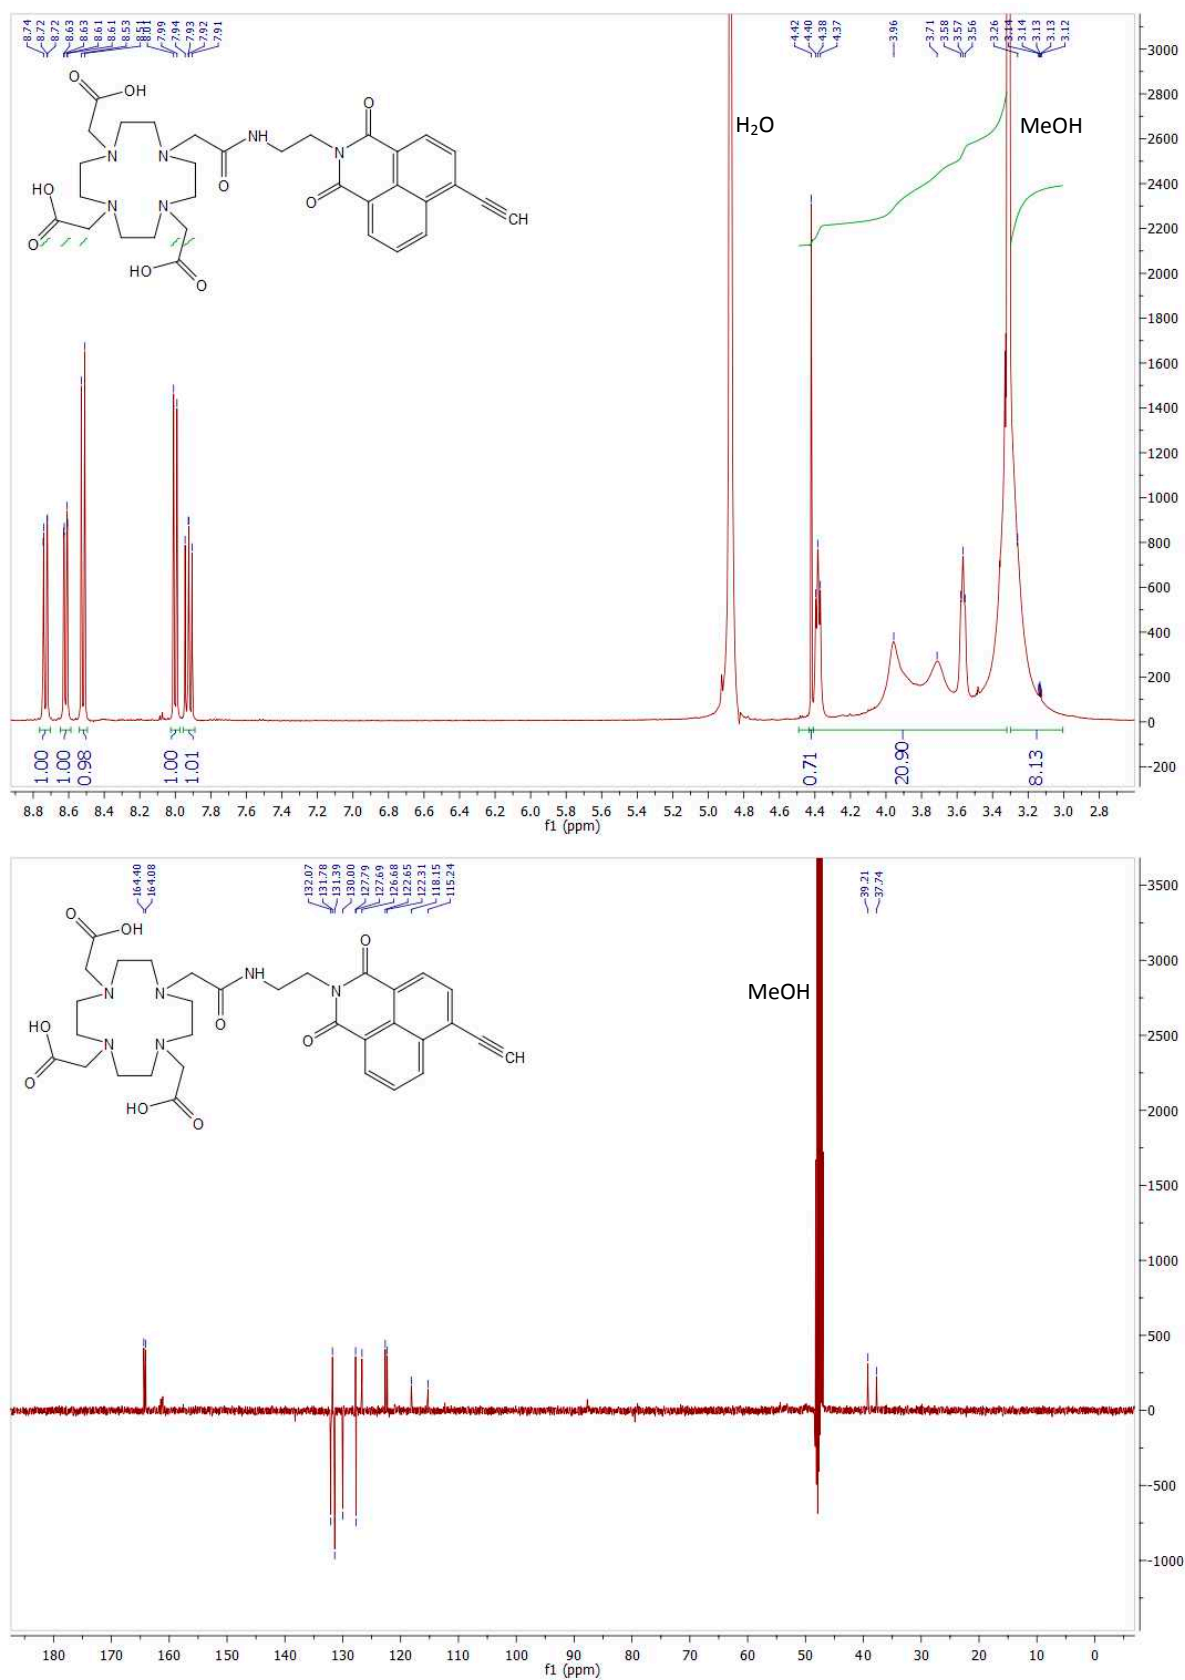

**Figure S6.** <sup>1</sup>H- and <sup>13</sup>C-NMR spectra of ligand L in CD<sub>3</sub>OD.

## LC Traces for Final Ligand and Gd(III) Complexes

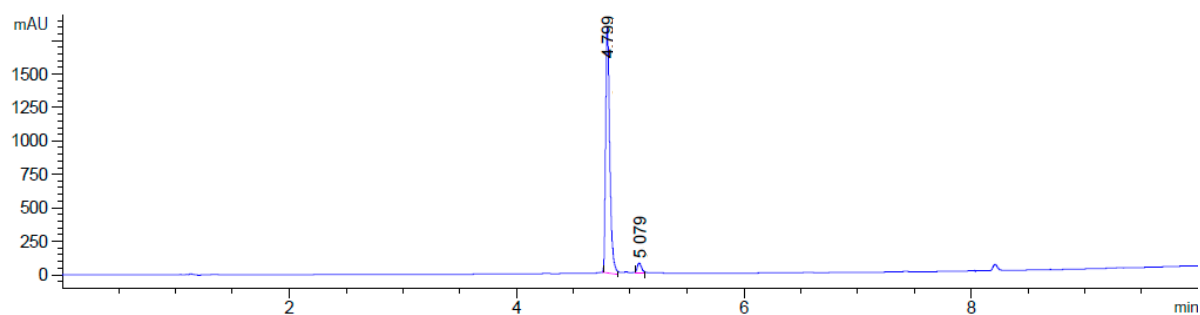

**Figure S7.** LC trace for ligand L (254nm).

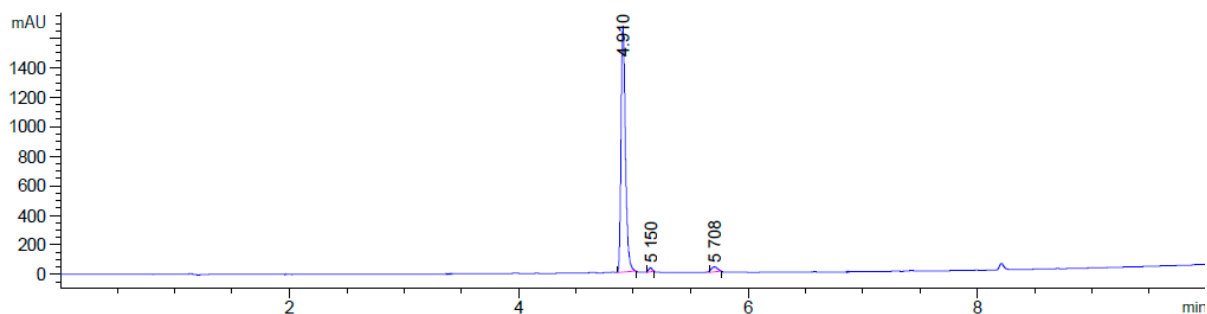

**Figure S8.** LC trace for Gd-L (254nm).

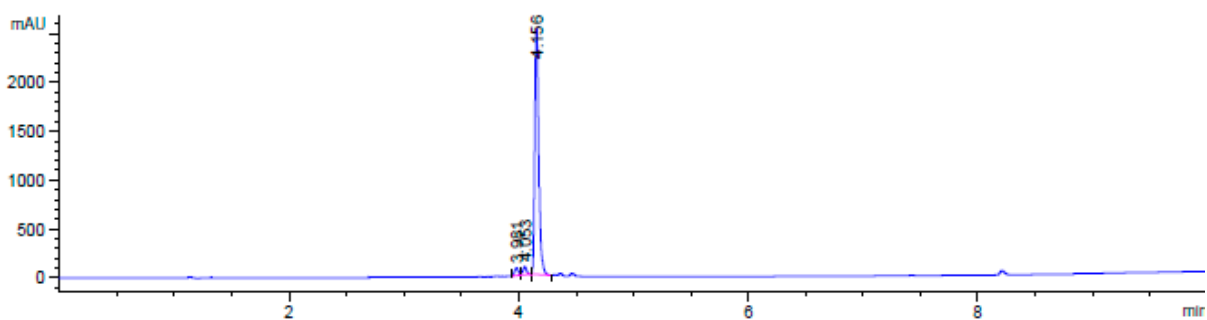

**Figure S9.** LC trace for "clicked" Gd-L (254nm).



## **LC Trace for Peptide Conjugate**

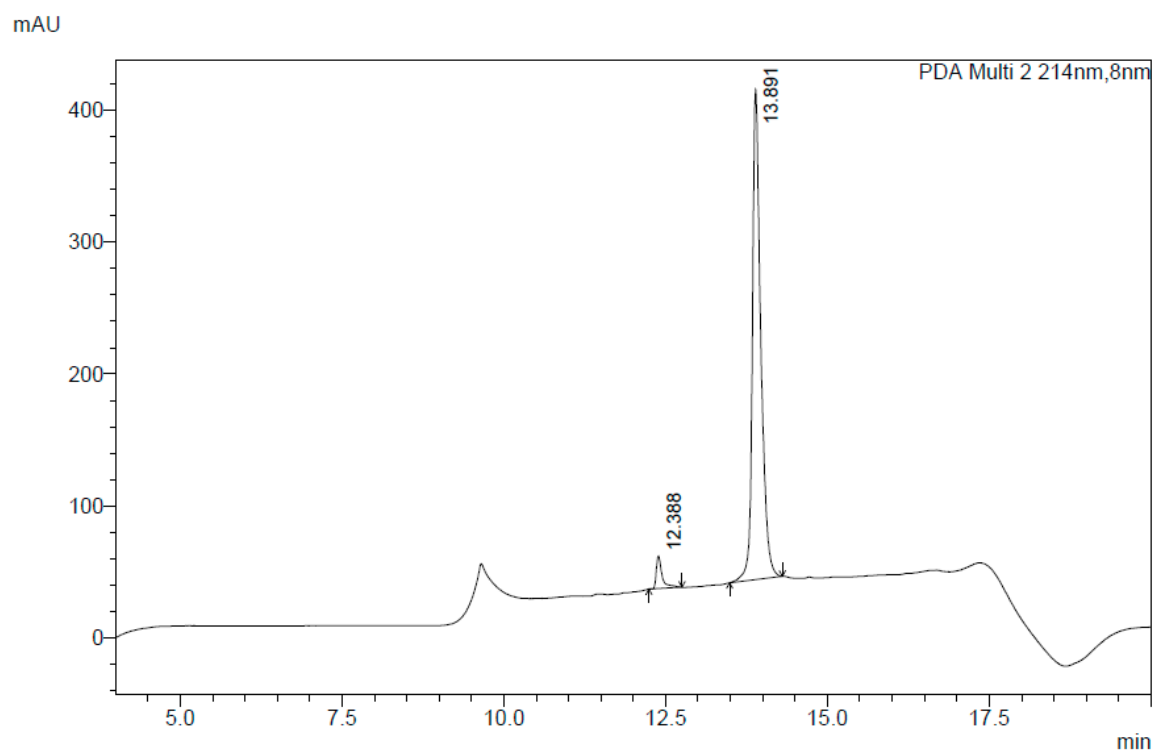

**Figure S10.** LC trace for Gd-L-Tat peptide conjugate (214 nm).
